# Supplementary material
Source: publisher figshare collection journal article supplement (https://sage.figshare.com/ndownloader/files/20161841)
Supplement: Supplementary file 1 [file 20161841]

**Supplementary Table S1. Names and locations of local ethics committees or institutional review boards.**

| <b>Ethics Committee or Institutional Review Board</b>                                                                                  | <b>Location</b>            |
|----------------------------------------------------------------------------------------------------------------------------------------|----------------------------|
| IRB & IEC of 81 Hospital of PLA                                                                                                        | Nanjing, China             |
| IEC of Affiliated Hospital of Academy of Military Sciences                                                                             | Beijing, China             |
| First Affiliated Hospital of Fourth Military Medical University Ethics Committee                                                       | Xian, China                |
| The Sir Run Run Shaw of Hospital                                                                                                       | Hangzhou, China            |
| Zhongshan Hospital Ethics Committee                                                                                                    | Shanghai, China            |
| Sun Yatsan University Cancer                                                                                                           | Guangzhou, China           |
| Nanfang Hospital                                                                                                                       | Guangzhou, China           |
| The Joint Chinese University of Hong Kong – New Territories East Cluster Clinical Research Ethics Committee (The Joint CUHK-NTEC CREC) | New Territories, Hong Kong |
| Institutional Review Board of the University of Hong Kong/Hospital Authority Hong Kong West Cluster (HKU/HA HKW IRB)                   | Hong Kong                  |
| SingHealth CIRB                                                                                                                        | Singapore, Singapore       |
| Institutional Review Board, Chulalongkorn University                                                                                   | Bangkok, Thailand          |
| Siriraj Institutional Review Board                                                                                                     | Bangkok, Thailand          |
| Office of The Khon Kaen University Ethics Committee in Human Research                                                                  | Khon Kaen, Thailand        |
| National Taiwan University Hospital Research Ethics Committee                                                                          | Taipei City, Taiwan        |
| Institutional Review Board National Cheng Kung University Hospital                                                                     | Tainan, Taiwan             |
